# Supplementary material
Source: Springer Nature journal article supplement (https://www.springermedizin.de/resource/supplementary/12936_2006_229_MOESM5_ESM.pdf/9547246)
Supplement: MOESM5 [file 9547246]

| <b>Risk factors</b>                            | <b>DUSHANBE</b><br>(deficient /<br>total) | <b>DANGARA</b><br>(deficient /<br>total) | <b>KUBODYION</b><br>(deficient /<br>total) | <b>TOTAL</b><br>(deficient /<br>total) |
|------------------------------------------------|-------------------------------------------|------------------------------------------|--------------------------------------------|----------------------------------------|
| <b>Ethnic origin</b>                           |                                           |                                          |                                            |                                        |
| Tajik                                          | 2/109                                     | 1/115                                    | 1/53                                       | 4/277                                  |
| Uzbek                                          | 0/9                                       | 0/14                                     | 4/71                                       | 4/94                                   |
| Tajiks reporting haemolysis<br>among relatives | 4/109                                     | 6/115                                    | 3/53                                       | 13/27                                  |
| Uzbeks reporting haemolysis<br>among relatives | 0/9                                       | 4/13*                                    | 2/71                                       | 6/93                                   |
| <b>Socio-economic status</b>                   |                                           |                                          |                                            |                                        |
| Class I                                        | 0/25                                      | 0/34                                     | 0/25                                       | 0/84                                   |
| Class II                                       | 1/14                                      | 0/21                                     | 1/24                                       | 2/59                                   |
| Class III                                      | 0/8                                       | 1/26                                     | 2/26                                       | 3/60                                   |
| Class IV                                       | 0/28                                      | 0/30                                     | 2/40                                       | 2/98                                   |
| Class V                                        | 1/50                                      | 0/19                                     | 0/10                                       | 1/79                                   |
| <b>Migration</b>                               |                                           |                                          |                                            |                                        |
| Working abroad                                 | 1/15                                      | 0/2                                      | 0/9                                        | 1/26                                   |
| Never worked abroad                            | 1/104                                     | 1/128                                    | 5/116                                      | 7/348                                  |
| Originating from the district                  | 1/36                                      | 1/121                                    | 5/119                                      | 7/276                                  |
| <b>Malaria infections</b>                      |                                           |                                          |                                            |                                        |
| Previous malaria infection                     | 0/9                                       | 0/20                                     | 1/47                                       | 1/76                                   |
| Never suffered from malaria<br>before          | 2/116                                     | 1/109                                    | 4/77                                       | 7/302                                  |

\* significant (X-squared=4.9704, p-value=0.02578)
